## NOMINATIONS SOUGHT FOR 2017 ASA Award for Excellence in Research

The annual American Society of Anesthesiologists (ASA) Award for Excellence in Research recognizes an individual for outstanding achievement in research that has or is likely to have an important impact on the practice of anesthesiology.

The individual's work must represent a body of original, mature, and sustained contribution to the advancement of the science of anesthesiology. The nominee need not be a physician, an anesthesiologist, or a member of the ASA, but must be presently engaged in research related to anesthesiology, academically accomplished with peer-reviewed publications and funded research, and nominated in response to a call for nominations. The completed application must include the nominee's current curriculum vitae, a letter of nomination, and a seconding letter from two individuals with an understanding of the research contributions of the individual.

The 2016 Award for Excellence in Research was presented to Michael M. Todd, M.D., at the ANESTHESIOLOGY 2016 annual meeting in Chicago on Monday, October 24, 2016. Dr. Todd is Professor Emeritus in the Department of Anesthesia, University of Iowa Carver College of Medicine, Iowa City, Iowa, and is presently Professor and Vice Chair for Research in the Department of Anesthesiology, University of Minnesota School of Medicine, Minneapolis, Minnesota.

The deadline for nominations for the 2017 Award for Excellence in Research is March 31, 2017. Please submit nominations or any questions regarding this award to Vicki Vass Tedeschi, Managing Editor, ANESTHESIOLOGY; e-mail: [managing-editor@anesthesiology.org](mailto:managing-editor@anesthesiology.org)

## NOMINATIONS SOUGHT FOR 2017 James E. Cottrell, M.D. Presidential Scholar Award (*made possible by an anonymous donation*)

The Society would like to announce that the American Society of Anesthesiologists (ASA) Presidential Scholar Award has been renamed the James E. Cottrell, M.D. Presidential Scholar Award (which was made possible by an anonymous donation). The award recognizes colleagues who dedicate their formative careers to research.

The James E. Cottrell, M.D. Presidential Scholar Award (made possible by an anonymous donation) recognizes colleagues who dedicate their formative careers to research. Anesthesiologists who are within 10 years of their first appointment to a department of anesthesiology, who are Board-certified in their country of practice, who are ASA members, and who are clinically active in anesthesia, intensive care, or pain medicine are eligible for the award. Nominees must be academically accomplished with peer-reviewed publications and funded research. Candidates should be nominated by their department chair or by the Committee on Research after review of the current year's grant applicants of the Foundation for Anesthesia Education and Research. The nominee's department chair should submit a letter of support and the nominee's current curriculum vitae as well as one seconding letter from a senior faculty member. Only one nominee per department will be accepted.

The recipient of the 2016 award was Hannah Wunsch, M.D., M.Sc., Department of Anesthesia, University of Toronto, Toronto, Canada, who received the award at the ANESTHESIOLOGY 2016 annual meeting in Chicago.

The deadline for nominations for the 2017 James E. Cottrell, M.D. Presidential Scholar Award (made possible by an anonymous donation) is March 31, 2017. Please submit nominations or any questions regarding this award to Vicki Vass Tedeschi, Managing Editor, ANESTHESIOLOGY; e-mail: [managing-editor@anesthesiology.org](mailto:managing-editor@anesthesiology.org).
